# Supplementary material for: Association of Moderate Beer Consumption with the Gut Microbiota and SCFA of Healthy Adults
Source: MDPI journal article supplement (doi:10.3390/molecules25204772), 2020-10-17
Supplement: s1 [file s1]

Table S1. Dietary profile in moderate beer consumers and abstainers (by sex).

| Beer consumption groups                    |                  |                  |                |        |
|--------------------------------------------|------------------|------------------|----------------|--------|
| Men                                        | ABS (n=18)       | BEER (n=15)      | P <sup>Y</sup> | P*     |
| Energy (kcal/d)                            | 2243 (836)       | 2092 (537)       | 0.550          | --     |
| Carbohydrates (%)                          | 42.29 (5.19)     | 40.28 (8.11)     | 0.415          | --     |
| Fiber (g/1000kcal)                         | 11.1 (4.0)       | 10.0 (3.3)       | 0.409          | --     |
| Fiber (g/d)                                | 24.3 (9.7)       | 21.2 (10.2)      | 0.383          | --     |
| Fiber from vegetables (g/d)                | 5.3 (3.5-8.0)    | 5.5 (3.6-7.9)    | --             | 0.957  |
| Fiber from fruit (g/d)                     | 5.1 (2.7-9.6)    | 2.5 (1.6-5.0)    | --             | 0.145  |
| Fiber from cereals (g/d)                   | 4.3 (2.7-7.0)    | 3.4 (2.8-6.0)    | --             | 0.709  |
| Fiber from legums (g/d)                    | 3.3 (2.0-3.8)    | 2.6 (1.1-3.7)    | --             | 0.486  |
| Fiber from other (olive, nuts, etc.) (g/d) | 3.1 (2.2-5.1)    | 1.7 (0.9-3.4)    | --             | 0.145  |
| Fiber from beer (g/d)                      | 0.0 (0.0-0.0)    | 0.5 (0.4-0.7)    | --             | <0.001 |
| Proteins (%)                               | 17.75 (2.15)     | 17.20 (2.85)     | 0.533          | --     |
| Fat (%)                                    | 39.63 (5.22)     | 38.40 (6.26)     | 0.543          | --     |
| Monounsaturated fat (%)                    | 17.31 (3.51)     | 17.64 (4.49)     | 0.814          | --     |
| Polyunsaturated fat (%) <sup>†</sup>       | 6.16 (1.29)      | 5.62 (1.81)      | 0.227          | --     |
| Saturated fat (%)                          | 11.10 (3.04)     | 10.92 (1.43)     | 0.836          | --     |
| Alcohol (%)                                | 0.26 (0.00-0.38) | 4.19 (2.89-5.48) | --             | <0.001 |
| Women                                      | ABS (n=26)       | BEER (n=19)      | P <sup>Y</sup> | P*     |
| Energy (kcal/d)                            | 1901 (447)       | 2186 (516)       | 0.054          | --     |
| Carbohydrates (%)                          | 39.76 (8.15)     | 38.14 (4.63)     | 0.402          | --     |
| Fiber (g/1000kcal)                         | 11.9 (3.5)       | 10.60 (2.07)     | 0.144          | --     |
| Fiber (g/d)                                | 22.1 (7.7)       | 22.9 (6.1)       | 0.723          | --     |
| Fiber from vegetables (g/d)                | 7.1 (5.3-10.1)   | 8.8 (5.9-9.7)    | --             | 0.581  |
| Fiber from fruit (g/d)                     | 3.7 (2.4-5.3)    | 4.0 (1.6-5.0)    | --             | 0.982  |
| Fiber from cereals (g/d)                   | 3.7 (2.2-4.7)    | 4.0 (2.1-5.1)    | --             | 0.573  |
| Fiber from legums (g/d)                    | 2.1 (1.7-3.3)    | 2.8 (1.5-3.9)    | --             | 0.613  |
| Fiber from other (olive, nuts, etc.) (g/d) | 2.6 (1.8-4.3)    | 2.3 (1.7-4.0)    | --             | 0.730  |
| Fiber from beer (g/d)                      | 0.0 (0.0-0.0)    | 0.6 (0.5-0.8)    | --             | <0.001 |
| Proteins (%)                               | 16.93 (3.06)     | 16.34 (2.40)     | 0.483          | --     |
| Fat (%)                                    | 42.97 (7.05)     | 40.95 (4.30)     | 0.277          | --     |
| Monounsaturated fat (%)                    | 19.55 (4.59)     | 19.01 (3.46)     | 0.667          | --     |
| Polyunsaturated fat (%) <sup>†</sup>       | 6.21 (1.62)      | 5.68 (1.49)      | 0.290          | --     |
| Saturated fat (%)                          | 11.94 (2.94)     | 11.59 (2.16)     | 0.663          | --     |
| Alcohol (%)                                | 0.0 (0.0-0.66)   | 3.92 (2.92-5.19) | --             | <0.001 |

<sup>Y</sup>Student's t test for parametric variables. <sup>\*</sup>Mann-Whitney U test for non-parametric variables. <sup>†</sup>Variables transformed to logarithmic scale (Ln). Statistical significance was set at P<0.05. <sup>‡</sup>Total dietary fiber is represented as the amount of fiber from beer (estimated [2]) plus dietary fiber obtained in the dietary analysis.

Deleted: CER

Deleted: CER

Table S2. Total alcohol intake and amount of alcohol intake by type of drink in moderate beer consumers and abstainers (by sex).

| Beer consumption groups |                 |                     |        |
|-------------------------|-----------------|---------------------|--------|
| Men                     | ABS (n=18)      | BEER (n=15)         | P*     |
| Total alcohol (g/d)     | 0.38 (0.0-0.73) | 14.67 (12.57-24.28) | <0.001 |
| Beer (alcohol g/d)      | 0.0 (0.0-0.0)   | 11.57 (10.29-17.13) | <0.001 |
| Wine (alcohol g/d)      | 0.0 (0.0-0.49)  | 0.0 (0.0-1.57)      | 0.259  |
| Spirits (alcohol g/d)   | 0.0 (0.0-0.09)  | 1.07 (0.54-2.86)    | <0.001 |
| Women                   | ABS (n=26)      | BEER (n=19)         | P*     |
| Total alcohol (g/d)     | 0.0 (0.0-0.71)  | 14.67 (12.39-21.47) | <0.001 |
| Beer (alcohol g/d)      | 0.0 (0.0-0.0)   | 13.5 (11.14-19.18)  | <0.001 |
| Wine (alcohol g/d)      | 0.0 (0.0-0.10)  | 0.39 (0.0-0.79)     | 0.018  |
| Spirits (alcohol g/d)   | 0.0 (0.0-0.09)  | 0.36 (0.0-0.71)     | 0.014  |

Data are shown as Median (IQR). \*Mann-Whitney U test. Statistical significance was set at P<0.05

Table S3. Relative abundances [%] of microbial phylum in moderate beer consumers and abstainers.

| Beer consumption groups |                  |                  |                |       |
|-------------------------|------------------|------------------|----------------|-------|
|                         | ABS (n=44)       | BEER (n=34)      | P <sup>#</sup> | P*    |
| Firmicutes              | 60.27 (9.49)     | 59.98 (9.07)     | 0.805          | --    |
| Bacteroidetes           | 22.57 (8.72)     | 24.74 (9.95)     | 0.221          | --    |
| Actinobacteria          | 3.20 (1.34-6.23) | 2.14 (0.98-4.25) | --             | 0.359 |

<sup>#</sup>"Group" effect in a general linear model. The Firmicutes model was adjusted for gender and the Bacteroidetes model was adjusted for total energy (kcal/day). \*Mann-Whitney U test for non-parametric variables. Statistical significance was set at P<0.05.

Deleted: 2

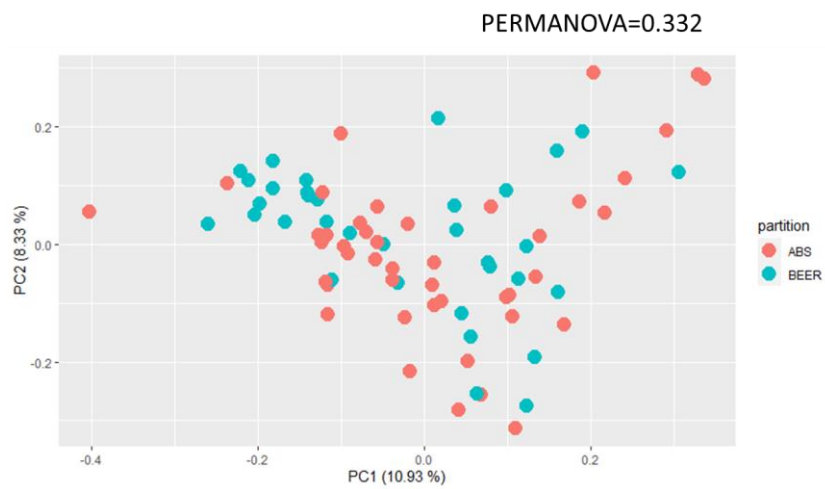

[Figure S1](#). Two-dimensional scatter plot of ABS and BEER groups generated using PCoA from the Bray-Curtis distance matrix. The PERMANOVA test was performed, introducing one by one, along with the “group” factor, the variables gender, age, BMI-fat and total energy, using the adonis command from the vegan package of R.

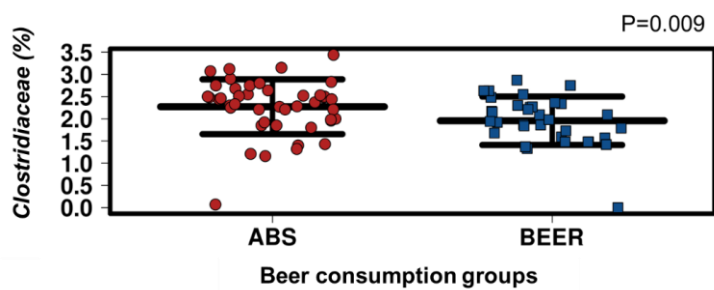

**Figure S2**. Differences in *Clostridiaceae* levels between beer consumption groups. ANOVA test.  $P < 0.05$ .

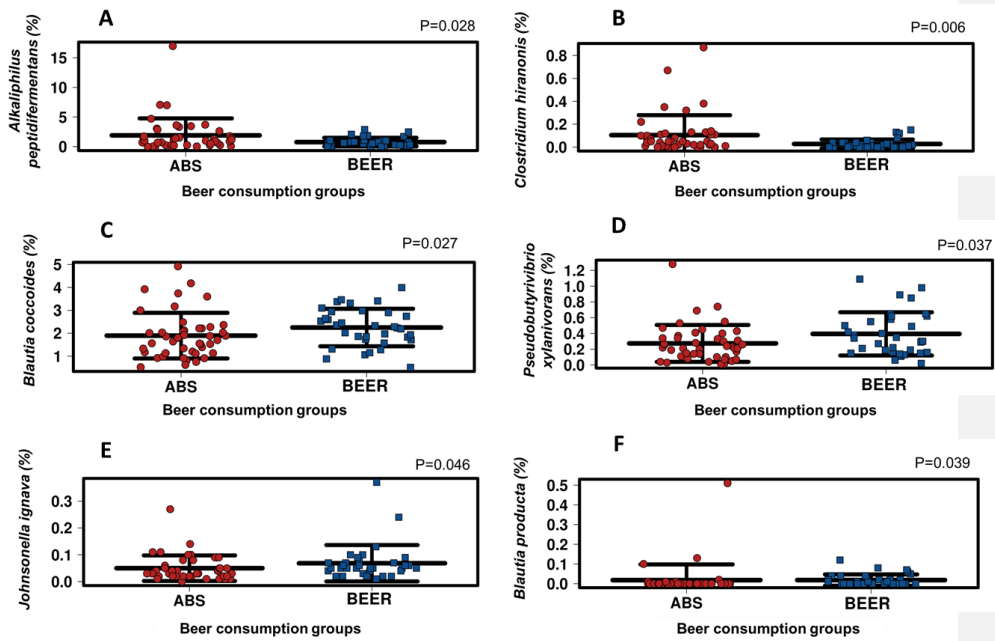

**Figure S3.** Differences between beer consumption groups in the levels of A) *Alkaliphilus peptidifermentans*; B) *Clostridium hiranonis*; C) *Blautia coccoides*; D) *Pseudobutyrvibrio xylanivorans*; E) *Johnsonella ignava*; and F) *Blautia producta*. MW-U test.  $P < 0.05$ .

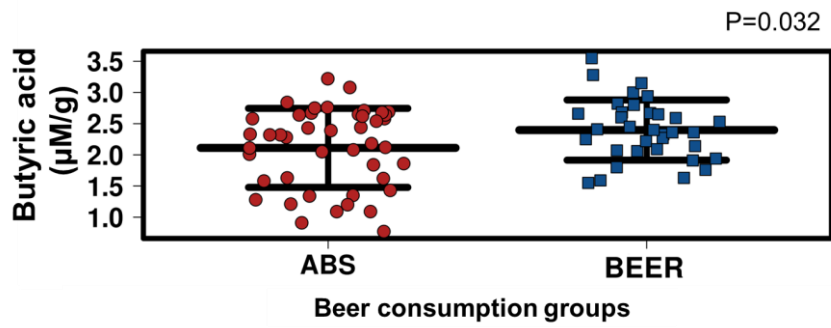

Figure S4. Differences in the production of butyric acid between beer consumption groups. ANOVA test.  $P < 0.05$ .
